# Supplementary material
Source: Research Square preprint supplement (doi:10.21203/rs.3.rs-8974224/v1)
Supplement: Supplementary file 1 [file 965efe19688a5fa2536197da.docx]

**Supplementary File 1: The SureHepB Instrument**

**SureHepB: A Survey on Knowledge, Attitude and Practice on Prevention of Mother-to-Child Transmission of Hepatitis B among Obstetric Nurses**

**Study ID:**

**Introduction**

Hepatitis B remains a major global public health concern and an important cause of chronic liver disease and hepatocellular carcinoma. Mother-to-child transmission (MTCT) is one of the key routes of hepatitis B virus (HBV) infection, particularly in endemic regions.

Obstetric nurses play a crucial role in screening, counselling, immunoprophylaxis, and clinical management aimed at preventing vertical transmission. The SureHepB instrument was developed to assess obstetric nurses’ knowledge, attitudes, and routine clinical practices regarding the prevention of mother-to-child transmission of hepatitis B.

**Instructions**

Participation in this questionnaire is voluntary.

All responses will remain confidential and will be used solely for research purposes. Please answer each question based on your current knowledge and routine clinical practice.

There are 4 parts in the questionnaire

| **PART A** | **:** | **SOCIODEMOGRAPHIC PROFILE** |
| --- | --- | --- |
| **PART B** | **:** | **KNOWLEDGE ON HEPATITIS B AND THE PREVENTION OF MOTHER-TO-CHILD TRANSMISSION (PMTCT) OF HEPATITIS B** |
| **PART C** | **:** | **NURSES' ATTITUDES TOWARD PREVENTING MOTHER-TO-CHILD TRANSMISSION (PMTCT) OF HEPATITIS B** |
| **PART D** | **:** | **ROUTINE CLINICAL PRACTICES IN PREVENTION OF MOTHER-TO-CHILD TRANSMISSION OF HEPATITIS B** |

**________________________________________________________________________________**

**PART A: Sociodemographic Profile**

Please provide the correct answer for the following questions.

| 1. | Age | .......................... years old | |
| --- | --- | --- | --- |
| 2. | Marital status |  | Single |
|  | Married |
|  | Widow |
|  | Divorced |
| 3. | Ethnic |  | Malay |
|  | Indian |
|  | Chinese |
|  | Bumiputera |
|  | Others (please state)  .......................................... |
| 4. | Level of education |  | SPM |
|  | Diploma |
|  | Diploma + Postbasic in Midwifery |
|  | Degree |
|  | Master |
|  | PhD |
| 5. | Years of experience | ............................... years | |
| 6. | Years of experience in maternal and child care | ............................... years | |
| 7. | Working place |  | Obstetrics Ward |
|  | Labour Room |
|  | Patient Assessment Center |
|  | Maternity OT |
|  | High Dependency Suite (HDS) |
|  | Obstetrics Clinic |
|  | Others (please state) ....................................... |
| 8. | Do you receive training on Mother-to-child transmission of hepatitis B |  | Yes |
|  | No |
| 9. | When do you receive the training related to hepatitis B and its prevention? (Please state the year, e.g., 2023). |  | |
| 10. | Type of training received |  | Workshop |
|  | Course |
|  | Continuous Nursing Education (CNE) |
|  | Online training |
|  | Others. Please specify  .................................................... |
| 11. | How frequently do you handle mothers diagnosed with hepatitis B? |  | 1-2 cases per day |
|  | 1-2 cases per week |
|  | 1-2 cases per month |
|  | 1-2 cases per year |
|  | I have never handled any cases |
| 12. | On average, how many newborns do you give the hepatitis B vaccine to each week? |  | None |
|  | 1-2 babies per week |
|  | 3-5 babies per week |
|  | More than 5 babies per week |
| 13. | Have you ever administered a hepatitis B immunoglobulin (HBIG) injection to a newborn |  | Yes |
|  | No |
| 14. | Do you have any family members who have been infected with hepatitis B (HBV)? |  | Yes |
|  | No |
| 15. | Do you know your current hepatitis B immune status (e.g. immune, non-immune, infected? |  | Yes |
|  | No |
|  | Not sure |
| 16. | Have you had all 3 doses of the hepatitis B vaccine? |  | Yes |
|  | No |
|  | Not sure |
| 17. | Have you ever been screened for your hepatitis B status during your time working in healthcare |  | Yes |
|  | No |
|  | Not sure |
| 18. | What is your hepatitis B antibody level? |  | >10 mIU/ml (Normal) |
|  | <10 mIU/ml (Kurang) |
|  | Not sure |

**PART B: Knowledge on Hepatitis B and the Prevention of Mother-to-Child Transmission (PMTCT) of Hepatitis B**

This section is designed **to** **assess your knowledge** about hepatitis B and the prevention of mother-to-child transmission (PMTCT) of hepatitis B in obstetric practice.

Please read each question carefully and mark ( √ ) only one answer that you believe is the most accurate from the options provided.

| 1. | The hepatitis B virus typically affects the organ of: | | | |
| --- | --- | --- | --- | --- |
|  | A. | Heart | C. | Kidney |
|  | B. | Liver | D. | Lung |
|  |  |  |  |  |
| 2. | Routes of transmission of Hepatitis B are as follows, EXCEPT: | | | |
|  | A. | Sharing food and drinks | C. | Sharing needles |
|  | B. | Sexual contact | D. | Mother-to-child transmission during the delivery process |
|  |  |  |  |  |
| 3. | The usual presentation in a mother with hepatitis B is: | | | |
|  | A. | Severe diarrhea | C. | Frontal headache |
|  | B. | Persistent itchiness | D. | No symptoms |
|  |  |  |  |  |
| 4. | The first step in preventing mother-to-child transmission is to: | | | |
|  | A. | Give antibiotics during pregnancy | C. | Give immediate antiviral therapy to all women |
|  | B. | Screen pregnant women for hepatitis B early in antenatal care | D. | Screen all family members for hepatitis B |
|  |  |  |  |  |
| 5. | The test used to screen pregnant women for hepatitis B is: | | | |
|  | A. | Venereal Disease Research Laboratory (VDRL) test | C. | Human Immunodeficiency Virus (HIV) test |
|  | B. | Hepatitis B surface antigen (HbsAg) test | D. | Full Blood Picture (FBP) test |
|  |  |  |  |  |
| 6. | The most common time of transmission of hepatitis B from mother-to-child is during | | | |
|  | A. | Pregnancy | C. | Breastfeed |
|  | B. | Delivery | D. | Childhood |
|  |  |  |  |  |
| 7. | The recommended action if a pregnant woman is diagnosed with high viral load hepatitis B (HBV DNA ≥ 200 000 IU/mL or ≥ 5.3 log10 IU/mL) is: | | | |
|  | A. | Elective caesarean section | C. | Early induction of labour |
|  | B. | Antiviral therapy during pregnancy | D. | No intervention needed |
|  |  |  |  |  |
| 8. | Antiviral medication is most commonly prescribed to pregnant women with hepatitis B to reduce vertical transmission is: | | | |
|  | A. | Ribavarin | C. | Efavirenz |
|  | B. | Acyclovir | D. | Tenofovir |
|  |  |  |  |  |
| 9. | Hepatitis B vaccine consists of: | | | |
|  | A. | Liver hepatitis B virus | C. | Recombinant hepatitis B surface antigen (HbsAg) produced yeast cell |
|  | B. | Inactivated virus | D. | Pork-derived gelatin |
|  |  |  |  |  |
| 10. | Newborns of hepatitis B-positive mothers should be given the birth dose of hepatitis B vaccine within: | | | |
|  | A. | 12 hours | C. | 48 hours |
|  | B. | 24 hours | D. | 7 days |
|  |  |  |  |  |
| 11. | The standard birth dose for hepatitis B vaccination is | | | |
|  | A. | 5 micrograms (mcg) | C. | 20 micrograms (mcg) |
|  | B. | 10 micrograms (mcg) | D. | 40 micrograms (mcg) |
|  |  |  |  |  |
| 12. | When educating patients about side effects of the hepatitis B vaccine, nurses should emphasize that: | | | |
|  | A. | All vaccines are completely free from any side effects | C. | Major organ failure is expected after vaccination |
|  | B. | Minor side effects are normal and a sign that the body is building protection | D. | Vaccination is only necessary if symptoms appear |
|  |  |  |  |  |
| 13. | The additional treatment is recommended for newborns of hepatitis B positive mothers besides the vaccine is | | | |
|  | A. | Antibiotics | C. | Hepatitis B immunoglobulin (HBIG) |
|  | B. | Vitamin K injection | D. | Oral antiviral syrup |
|  |  |  |  |  |
| 14. | The correct statement about breastfeeding among women with hepatitis B is: | | | |
|  | A. | It is not allowed | C. | It is only allowed after the baby is 6 months old |
|  | B. | Safe with proper immunoprophylaxis | D. | It should be avoided if the mother receives antiviral therapy |
|  |  |  |  |  |
| 15. | Inadequate hepatitis B prevention among the children can lead to: | | | |
|  | A. | Chronic hepatitis b | C. | HIV infection |
|  | B. | Malnutrition | D. | Childhood asthma |

**Part C: Nurses' Attitudes Toward Preventing Mother-To-Child Transmission (PMTCT) of Hepatitis B**

This section is designed **to** **evaluate your attitudes** toward the prevention of mother-to-child transmission (PMTCT) of hepatitis B.

Please indicate the extent to which you agree or disagree with each of the following statements by selecting the most appropriate response on the scale below:

| Scale | Meaning |
| --- | --- |
| 1 | Strongly disagree |
| 2 | Disagree |
| 3 | Neutral |
| 4 | Agree |
| 5 | Strongly Agree |

Please respond based on your personal opinions by ticking (√) one box for each statement.

Each statement begins with: **“In my opinion…”**

| **No.** | **Item Statement** | **1** | **2** | **3** | **4** | **5** |
| --- | --- | --- | --- | --- | --- | --- |
|  | **Preventive Awareness** | | | | | |
| 1 | Preventing mother-to-child transmission of hepatitis B is crucial for protecting the health of the community. |  |  |  |  |  |
| 2 | Hepatitis B related complications are severe enough to justify strict adherence to vaccination guidelines. |  |  |  |  |  |
|  | **Professional Responsibilities** | | | | | |
| 3 | Antiviral therapy during pregnancy will benefit hepatitis B-positive mothers and their newborns. |  |  |  |  |  |
| 4 | I am confident in handling mothers who are unsure or worried about the hepatitis B vaccine. |  |  |  |  |  |
| 5 | Every healthcare provider should actively promote hepatitis B prevention during antenatal care. |  |  |  |  |  |
| 6 | Routine hepatitis B screening should be carried out for all pregnant women to prevent transmission |  |  |  |  |  |
| 7 | Educating mothers about hepatitis B can significantly reduce the risk of mother-to-child transmission. |  |  |  |  |  |
| 8 | Early identification of hepatitis B-positive mothers is key to successful prevention strategies. |  |  |  |  |  |
| 9 | Effective communication with pregnant mothers improves hepatitis B prevention efforts. |  |  |  |  |  |

**Part D: Routine Clinical Practices in the Prevention Of Mother-to-Child Transmission Of Hepatitis B**

This section aims **to assess your routine clinical practices** related to the prevention of mother-to-child transmission (PMTCT) of hepatitis B in obstetric settings.

Please indicate how frequently you perform each of the following practices in your daily clinical duties by selecting the most appropriate response using the scale provided below:

| Scale | Meaning |
| --- | --- |
| 1 | Never |
| 2 | Rarely |
| 3 | Sometimes |
| 4 | Often |
| 5 | Always |

Kindly tick ( √ ) one box for each statement.

Each statement begins with: **“I routinely …”**

| **No.** | **Item Statement** | **1** | **2** | **3** | **4** | **5** |
| --- | --- | --- | --- | --- | --- | --- |
| 1 | Check the hepatitis B status of pregnant women during admission. |  |  |  |  |  |
| 2 | Administer the hepatitis B vaccine to newborns within 24 hours. |  |  |  |  |  |
| 3 | Administer hepatitis B immunoglobulin (HBIG) to newborns born to hepatitis B-positive mothers. |  |  |  |  |  |
| 4 | Adhere to infection control protocols to reduce the risk of hepatitis B transmission in the labour and delivery unit. |  |  |  |  |  |
| 5 | Alert the neonatal team when a baby is born to a hepatitis B-positive mother. |  |  |  |  |  |
| 6 | Report any missed hepatitis B vaccination or prophylaxis for newborns. |  |  |  |  |  |

Thank you for your time and participation in this study ☺

**Scoring Method**

**Knowledge**

Correct answer = 1

Incorrect answer = 0

Higher score indicates greater knowledge.

**Attitude**

5-point Likert scale (1–5).

Higher score indicates more positive attitude toward PMTCT.

**Practice**

5-point Likert scale (1–5).

Higher score indicates better preventive clinical practice.
